# Supplementary material
Source: HighWire-hosted journal article supplement (https://erj.ersjournals.com/content/53/3/1801770)
Supplement: inline-supplementary-material-1 [file inline-supplementary-material-1.pdf]

**Inclusion Criteria:**

1. Aged between 18 to 65;
2. Active pulmonary TB with isolates resistant to rifampicin and isoniazid.
3. Sputum culture positive for *Mycobacterium Tuberculosis*.

**Exclusion Criteria:**

1. Proven or probable XDR-TB: previously treated with fluoroquinolones and second-line injectable drugs for more than 1 month but without any laboratory results proving susceptibility to fluoroquinolones or second-line injectable drugs.
2. a Karnofsky performance-status score of 50 or less
3. history of active TB more than 3 years
4. HIV positive
5. Serum bilirubin 3 times greater than the upper limit of normal
6. Prolonged QT interval exceeding 450ms
7. Serum creatinine 1.5 times higher than upper limit
